# Supplementary material for: Antitumor Activity of Ethanolic Extract ofDendrobium formosumin T-Cell Lymphoma: AnIn VitroandIn VivoStudy
Source: Hindawi journal article supplement (doi:10.1155/2014/753451), 2014-01-01
Supplement: f1 [file 753451.f1.pdf]

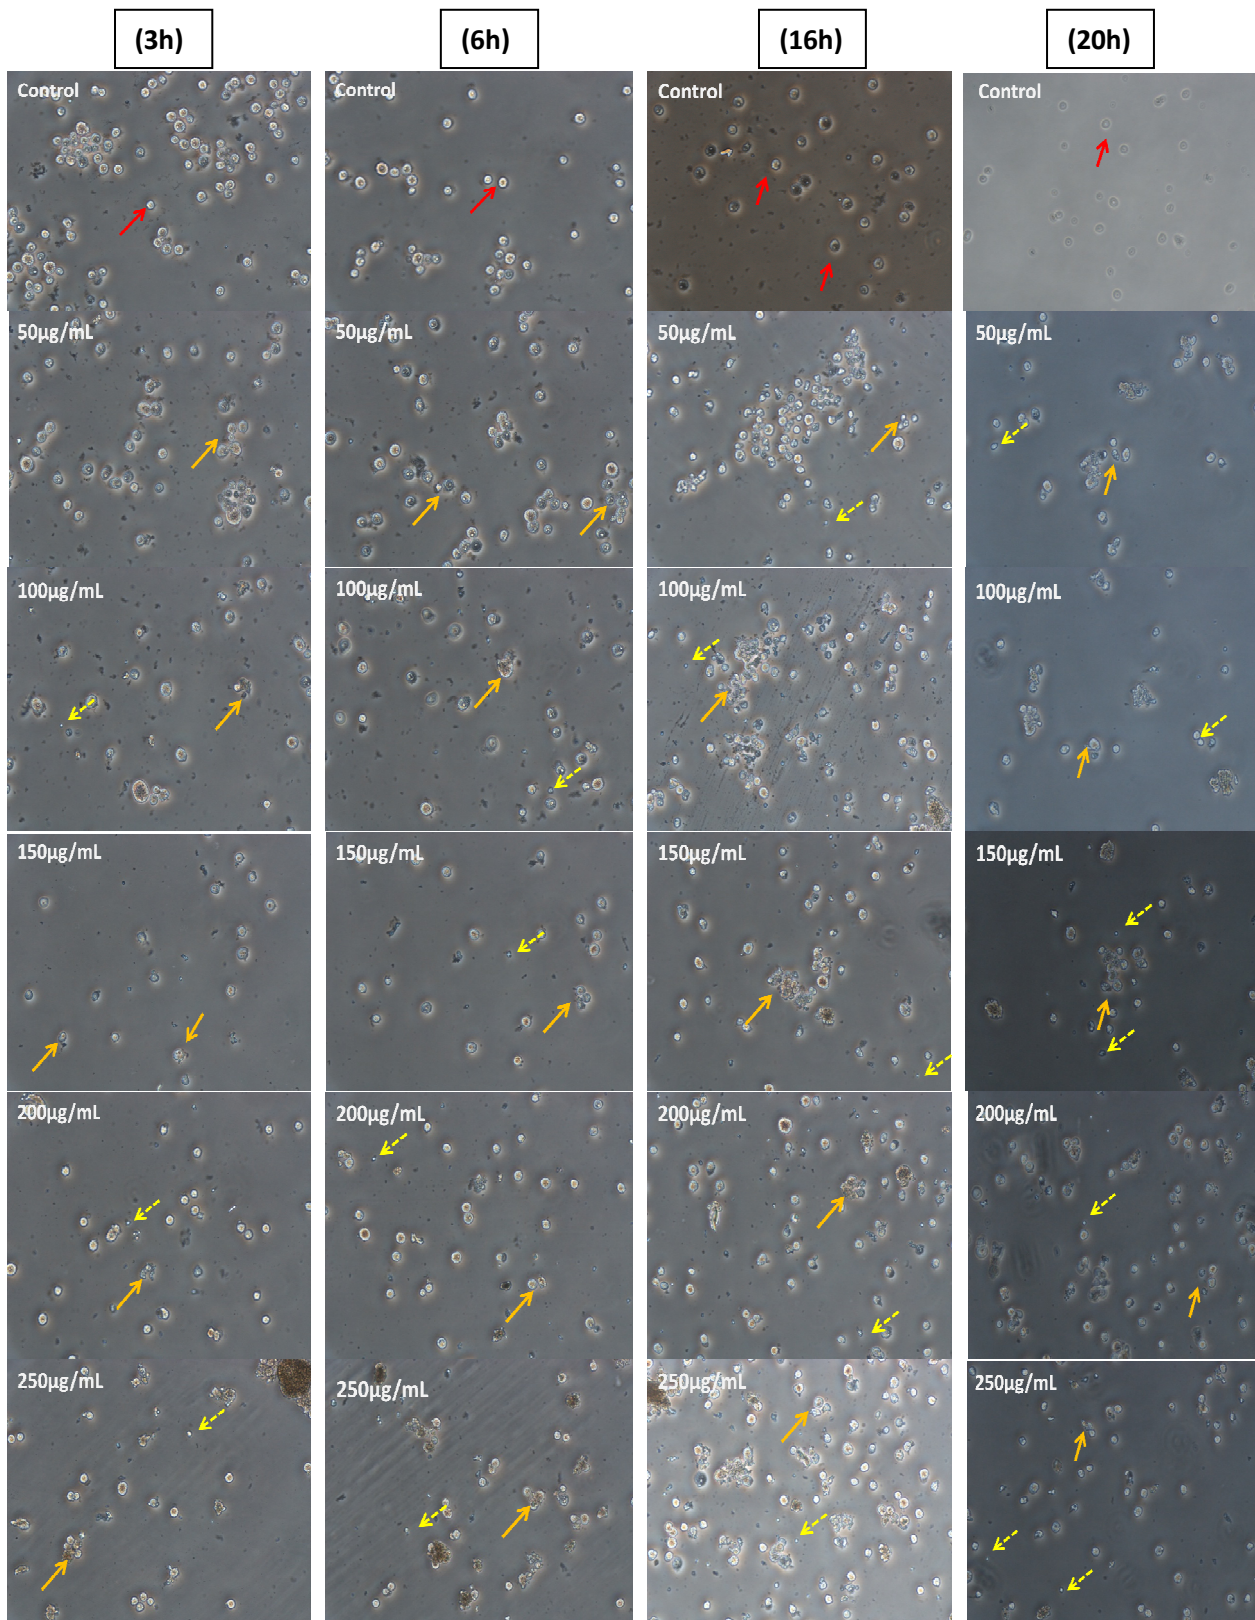

Fig.1. Phase contrast microscopy images of DL cells showing morphological changes induced by *D. formosum* ethanolic extract at 50, 100, 150, 200 and 250µg/mL concentration and control for 24h. Red arrow shows live cells, yellow arrow represent apoptotic cells and dotted yellow arrow shows presence of apoptotic bodies (late stage apoptosis)].
